# Supplementary material for: Prognostic impact of nutritional and inflammation-based risk scores in follicular lymphoma in the era of anti-CD20 targeted treatment strategies
Source: PubMed Central journal article supplement (PMC9189087; doi:10.1007/s00432-021-03758-5), 2021-08-20

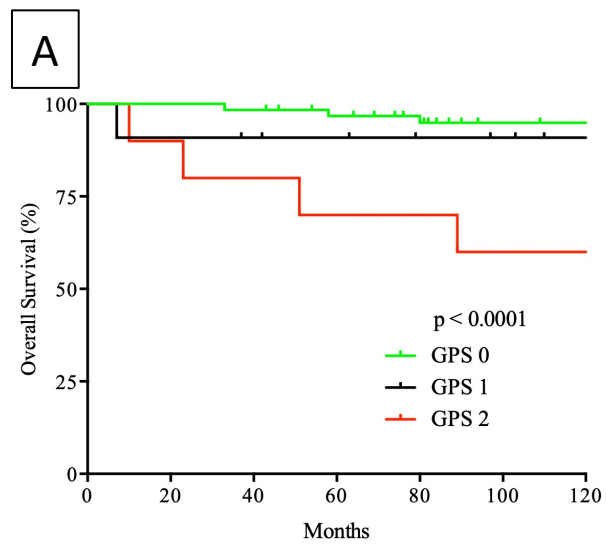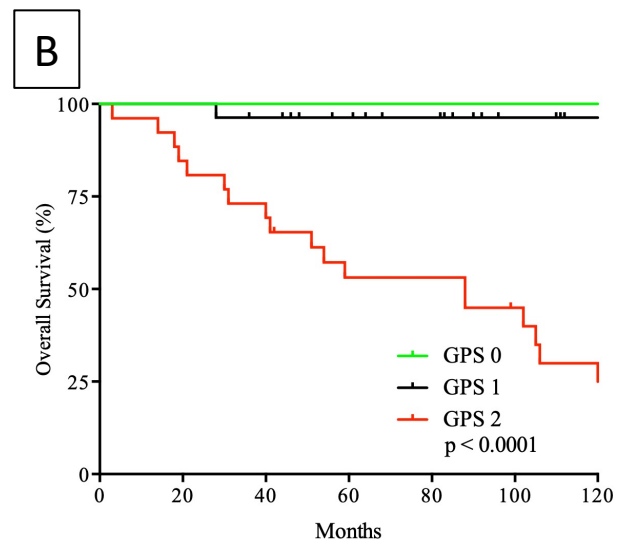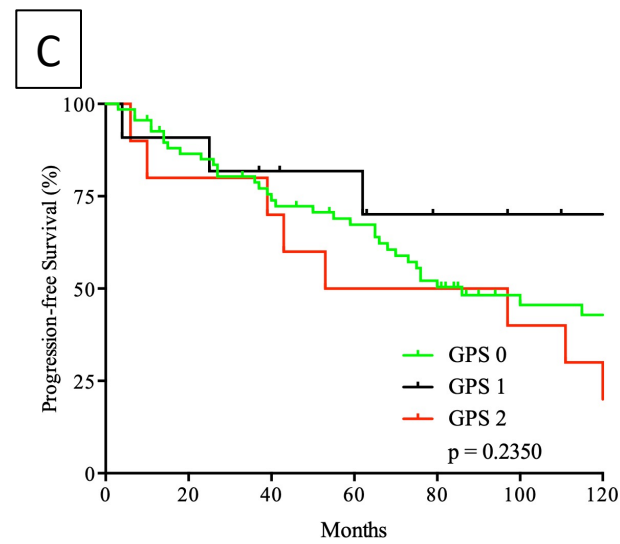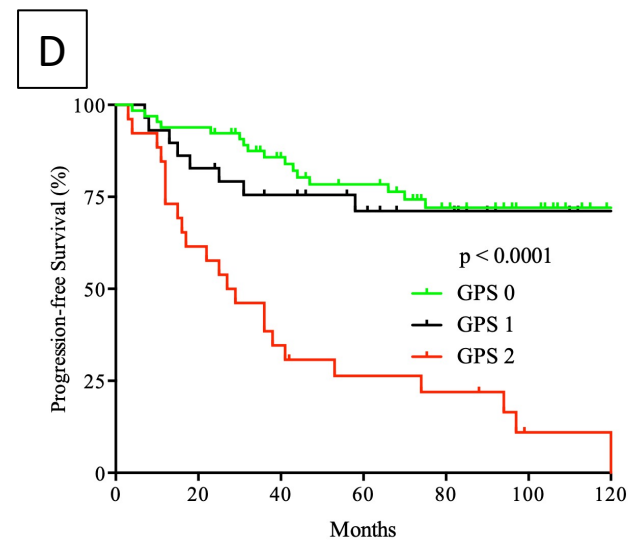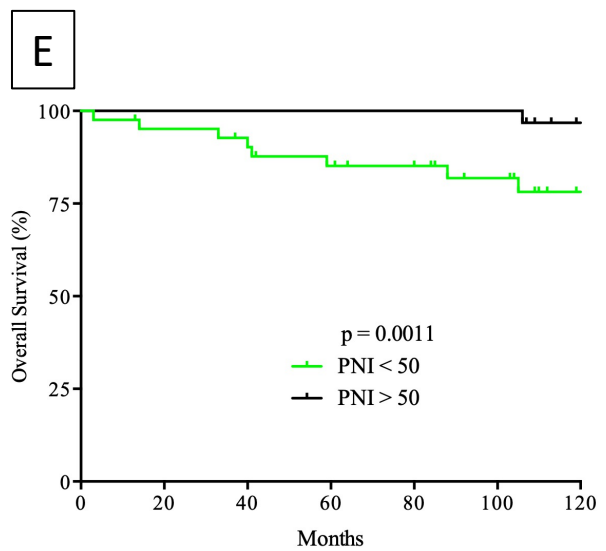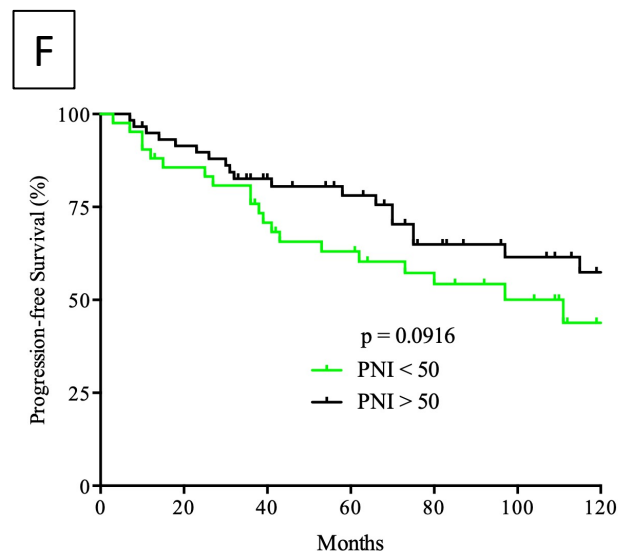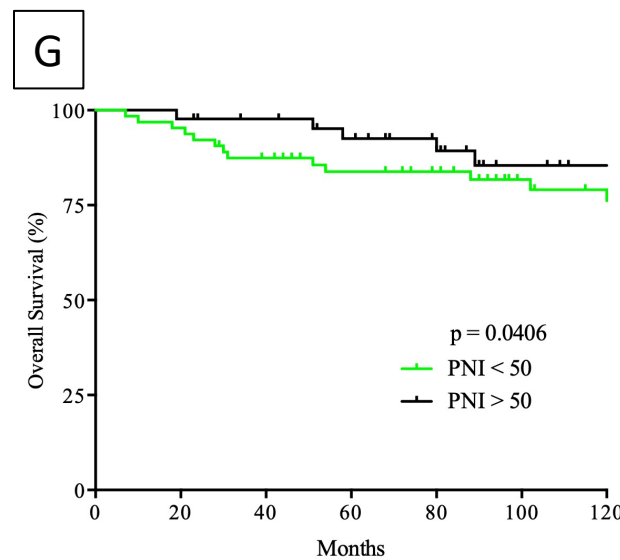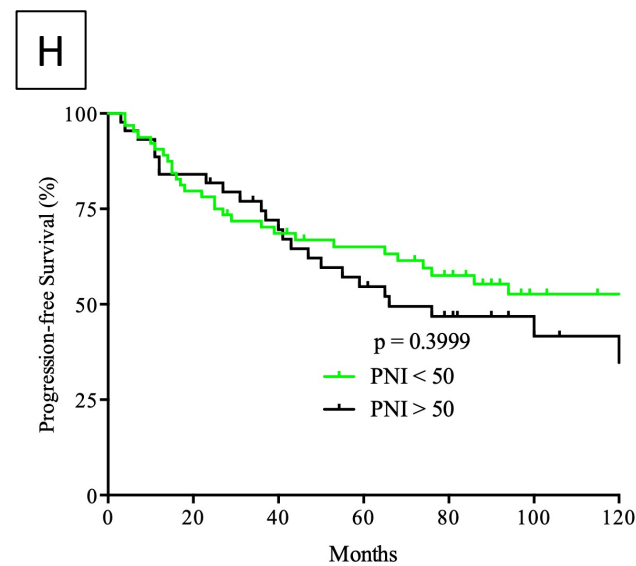

Supplement: 432_2021_3758_MOESM2_ESM.pdf [file 432_2021_3758_MOESM2_ESM.pdf]
